# Supplementary material for: Sn-Doped Hematite Films as Photoanodes for Photoelectrochemical Alcohol Oxidation
Source: MDPI journal article supplement (doi:10.3390/catal13111397), 2023-10-26
Supplement: s1 [file s1]

# Sn-doped Hematite Films as Photoanodes for Photoelectrochemical Alcohol Oxidation

Vitali A. Grinberg, Victor V. Emets, Alexander D. Modestov\*, Aleksey A. Averin, Andrei A. Shiryayev, Inna G. Botryakova and Aleksey V. Shapagin

Frumkin Institute of Physical Chemistry and Electrochemistry, Russian Academy of Sciences, Leninsky Prospekt 31, Building 4, 119071 Moscow, Russia; vitgreen@mail.ru (V.A.G); victoremets@mail.ru (V.V.E); amodestov@mail.ru (A.D.M.); alx.av@yandex.ru (A.A.A); a\_shiryayev@mail.ru (A.A.S.); mnemozina86@list.ru (I.G.B.); shapagin@mail.ru (A.V.S.)

\* Correspondence: amodestov@mail.ru.

## Supplementary materials

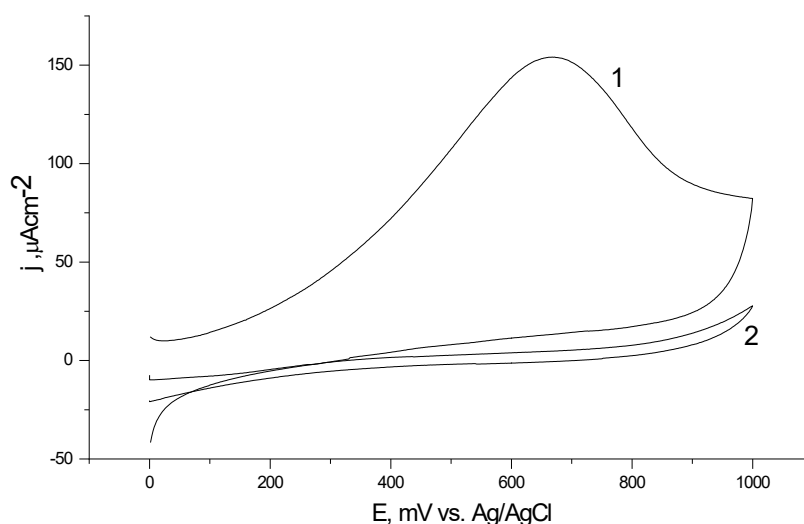

**Fig. S1.** Cyclic voltammogram on glassy carbon electrode ( $0.0078 \text{ cm}^2$ ): (1)–25 mM  $\text{SnCl}_2$ - 0.1 M KCl; (2) – 25 mM  $\text{SnCl}_2$ - 0.1 M KCl + 1M  $\text{H}_2\text{O}_2$ . Scan rate  $0.1 \text{ Vs}^{-1}$ .

In the presence of  $\text{H}_2\text{O}_2$  in the electrolyte of film electrodeposition, formation of  $\text{Sn}^{4+}$  and  $\text{SnO}$  takes place. Peak of  $\text{Sn}^{2+}$  oxidation is not observed (CV 2).

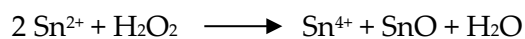

The anodic current peak at 660 mV on cyclic voltammogram (1) can be assigned to the anodic oxidation of the  $\text{Sn}^{2+}$  to  $\text{Sn}^{4+}$ . The value of the oxidation current peak indicates that electrooxidation is accompanied by the transfer of two electrons.

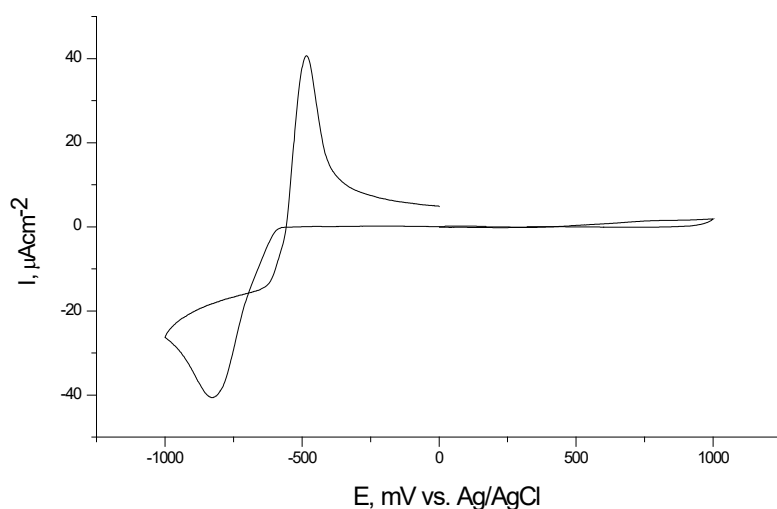

**Fig. S2.** Cyclic voltammogram of  $\text{SnCl}_2$  (7.5 mM) on glassy carbon electrode ( $0.0078 \text{ cm}^2$ ) in 0.1 M KCl. Scan rate  $0.1 \text{ Vs}^{-1}$ .

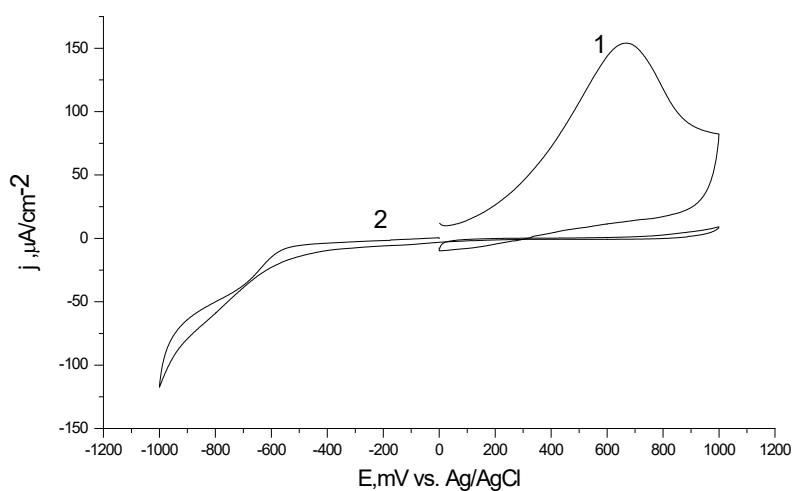

**Fig. S3.** Cyclic voltammogram of  $\text{SnCl}_2$  (25 mM) on glassy carbon electrode ( $0.0078 \text{ cm}^2$ ) (1) and in the presence of 1M  $\text{H}_2\text{O}_2$  (2) in 0.1 M KCl. Scan rate  $0.1 \text{ V s}^{-1}$ .

The cathodic current density peak is observed at approximately  $-0.82 \text{ V}$ . Thereby, the cathodic current peak could be attributed to the reduction of  $\text{Sn}^{2+}$  species to metal Sn. A single anodic current peak is observed during the reversal sweep. The anodic current peak is assigned to the anodic stripping of the Sn deposit during the forward scan. The value of potential difference is  $\sim 400 \text{ mV}$ , which is larger than the theoretical value for the reversible process ( $31 \text{ mV}$ ,  $323 \text{ K}$ ). It was typically associated with quasi-reversible electrode reaction process. These characteristics indicate that the reduction of  $\text{Sn(II)}$  is a quasi-reversible, single-step two-electron-transfer process.

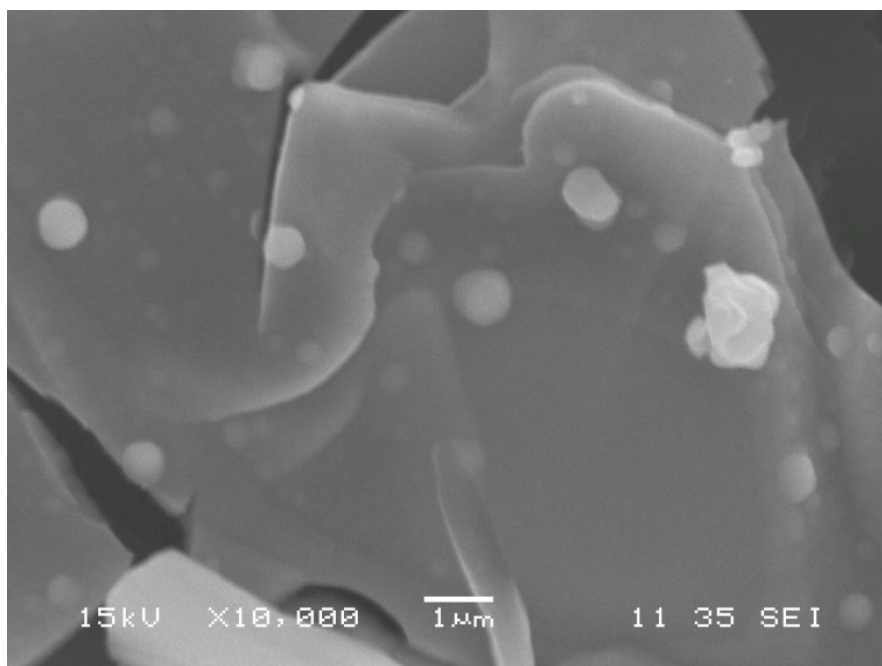

Title : IMG2

---

Instrument :

Volt : 15.00 kV

Mag : x 15,000

Date : 2023/10/10

Pixel : 640 x 480

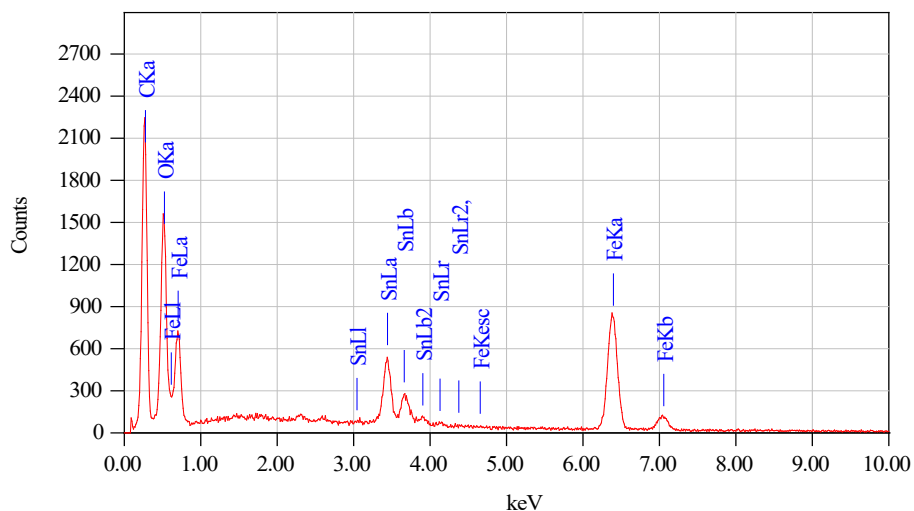

#### Acquisition Parameter

Instrument : 6060 (LA)

Acc. Voltage : 15.0 kV

Probe Current: 1.00000 nA

PHA mode : T3

Real Time : 56.64 sec

Live Time : 50.00 sec

Dead Time : 11 %

Counting Rate: 2298 cps

Energy Range : 0 - 20 keV

ZAF Method Standardless Quantitative Analysis  
Fitting Coefficient : 0.2075

| Element | (keV) | mass%  | Error% | At%    | Compound | mass% | Cation | K       |
|---------|-------|--------|--------|--------|----------|-------|--------|---------|
| C K     | 0.277 | 30.45  | 0.02   | 55.37  |          |       |        | 17.8793 |
| O K     | 0.525 | 20.68  | 0.08   | 28.23  |          |       |        | 20.6259 |
| Fe K    | 6.398 | 35.80  | 0.31   | 14.00  |          |       |        | 46.5437 |
| Sn L    | 3.442 | 13.06  | 0.23   | 2.40   |          |       |        | 14.9511 |
| Total   |       | 100.00 |        | 100.00 |          |       |        |         |

Fe:O:Sn= 1: 2.01 : 0.17

**Fig. S4a.** SEM and EDX spectrum of ( $\alpha$ -Fe<sub>2</sub>O<sub>3</sub>+10% Sn<sup>4+</sup>) film on a glassy carbon plate

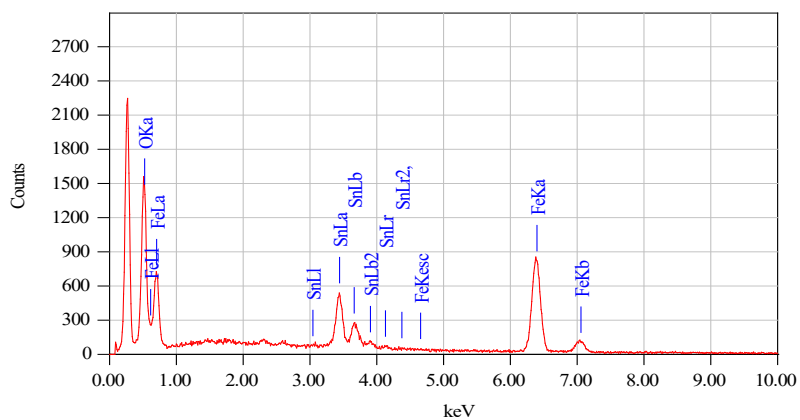

#### Acquisition Parameter

Instrument : 6060 (LA)  
 Acc. Voltage : 15.0 kV  
 Probe Current: 1.00000 nA  
 PHA mode : T3  
 Real Time : 56.64 sec  
 Live Time : 50.00 sec  
 Dead Time : 11 %  
 Counting Rate: 2298 cps  
 Energy Range : 0 - 20 keV

#### ZAF Method Standardless Quantitative Analysis

Fitting Coefficient: 0.4800

| Element                | (keV) | mass%  | Error% | At%    | Compound | mass% | Cation | K       |
|------------------------|-------|--------|--------|--------|----------|-------|--------|---------|
| O K                    | 0.525 | 23.87  | 0.46   | 56.11  |          |       |        | 25.1608 |
| Fe K                   | 6.398 | 55.44  | 2.48   | 37.33  |          |       |        | 56.6437 |
| Sn L                   | 3.442 | 20.69  | 1.89   | 6.56   |          |       |        | 18.1955 |
| Total                  |       | 100.00 |        | 100.00 |          |       |        |         |
| Fe:O:Sn= 1: 1.5 : 0.17 |       |        |        |        |          |       |        |         |

**Fig. S4b.** EDX spectrum of ( $\alpha$ -Fe<sub>2</sub>O<sub>3</sub>+10% Sn<sup>4+</sup>) film excluding carbon of GC substrate

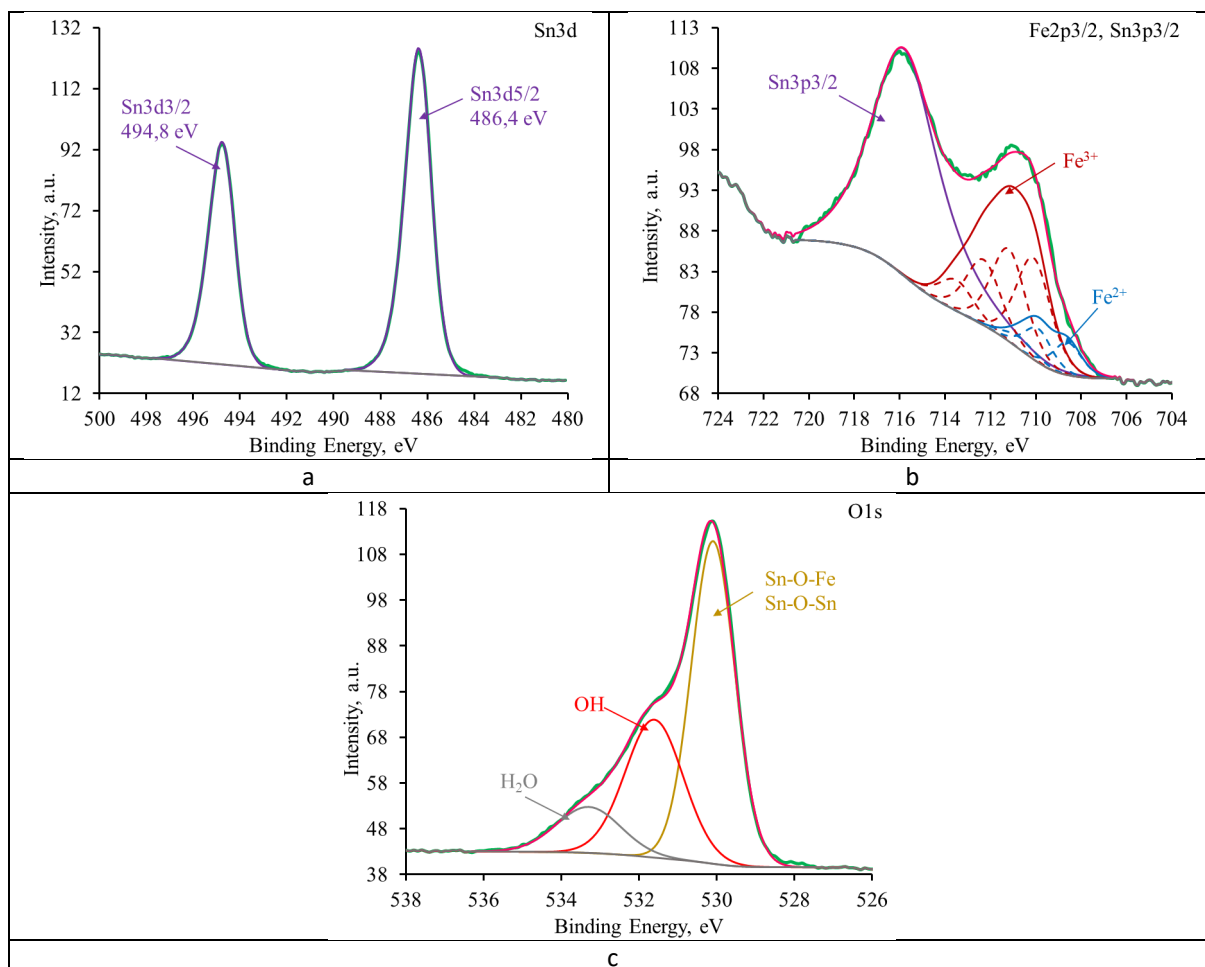

**Fig. S5.** XPS spectra of  $(\alpha\text{-Fe}_2\text{O}_3 + 10\% \text{Sn}^{4+})$  film on FTO. Spectrum of tin Sn3d(a), region Fe2p<sub>3/2</sub> and Sn3p<sub>3/2</sub> (b) and oxygen O1s(c)

#### Sample surface element concentrations

| Peak name           |                  | $E_b$ , eV | Quant., at. % |       |
|---------------------|------------------|------------|---------------|-------|
| O1s                 | Sn-O-Fe          | 530,1      | 44,19         | 69,36 |
|                     | OH               | 531,6      | 25,17         |       |
| Sn3d                | Sn(IV)           | 486,4      | 11,31         | 11,31 |
| Fe2p <sub>3/2</sub> | Fe <sup>3+</sup> | 710,5      | 15,74         | 19,32 |
|                     | Fe <sup>2+</sup> | 708,6      | 3,58          |       |

The chemical state of doped hematite identified by XPS spectra can be used to understand the chemical valence and bonding situation of element. In this work, spectra in the region of Sn3d (480-500 eV), Fe2p<sub>3/2</sub> (704-724 eV) and O1s (526-538 eV) were obtained and analyzed.

According to the obtained curves, in the region of the tin 3d level (Fig.S5a), two peaks of the spin-orbit splitting Sn3d<sub>5/2</sub> – Sn3d<sub>3/2</sub> are observed with positions of 486.4 and 494.8 eV and a full width at half maximum (FWHM) of 1.37 eV. The intensity ratio [Sn3d<sub>5/2</sub>]:[Sn3d<sub>3/2</sub>] is 3:2. Due to the small shift between the Sn3d<sub>5/2</sub> maxima for Sn(II) and Sn(IV), it is not possible to unambiguously determine the state from the experimental curve.

To more accurately determine the iron states, the Fe2p<sub>3/2</sub> spectrum was used (Fig. S5b). In this spectrum, there is an overlap of peaks related to iron and the tin peak Sn3p<sub>3/2</sub>. Sn3p<sub>3/2</sub> peaks at 715.8 eV and FWHM 3.6 eV. The iron states were adjusted according to [63] with an increase in FWHM for the peaks relative to those presented in the above article by a factor of 1.4 due to the difference in transmission energies and

differences between the morphology of the powder and the surface of the coated plate. According to the results, after subtracting the background and isolating the tin component, iron is in two states, which can be attributed to  $\text{Fe}^{3+}$  with a maximum of 710.5 eV and  $\text{Fe}^{2+}$  with a maximum of 708.6 eV.

The oxygen O1s spectrum (Fig. S5c) can be fitted with three peaks. The most intense one with a maximum of 530.1 eV and FWHM of 1.4 eV can be attributed to the Sn-O-Fe and Sn-O-Sn bonds. The peak at 531.6 eV (FWHM 1.8 eV) is in the hydroxide region and is designated OH in the figure, and there is also a peak at 533.3 eV, which can be attributed to water vapor adsorbed from the air or remaining after the coating process.

Using the integrated peak intensities, as well as elemental sensitivity coefficients, the atomic concentrations of elements on the surface of the sample were determined, which are presented in Table . Based on the concentrations, we can assume the presence of  $\text{Fe}(\text{OH})_3$ , which is probably an agent that binds deeper layers with the tin of the coating, where each tin atom forms a bond through oxygen with  $\text{Fe}^{3+}$  cations in most cases and a small number of atoms bonded through Sn-O- $\text{Fe}^{2+}$ -O-Sn.

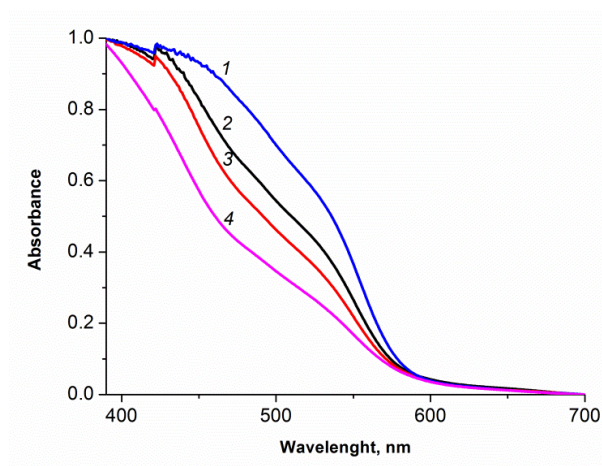

**Fig. S6.** Normalized absorption spectra for the film photoanodes: (1) – ( $\alpha\text{-Fe}_2\text{O}_3$ ); (2)– ( $\alpha\text{-Fe}_2\text{O}_3$ + 5%  $\text{Sn}^{4+}$ ); (3) ( $\alpha\text{-Fe}_2\text{O}_3$ +10% $\text{Sn}^{4+}$ ); and (4) – ( $\alpha\text{-Fe}_2\text{O}_3$ +20% $\text{Sn}^{4+}$ ).

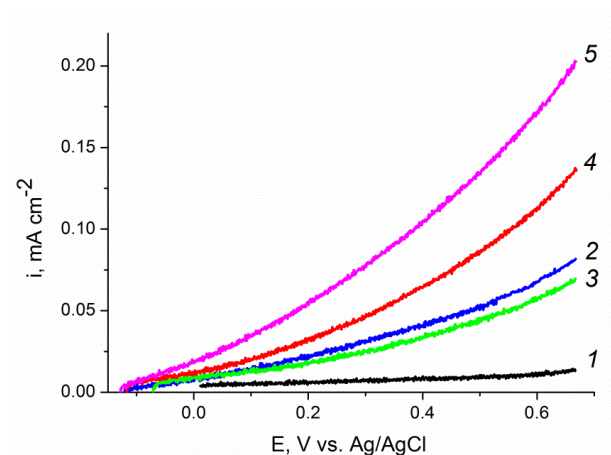

**Fig. S7.** Voltammograms of the ( $\alpha\text{-Fe}_2\text{O}_3$ ) film photoanode: (1) – dark voltammetry in 0.1 M KOH; (2 - 5) – voltammetry curves measured under visible light illumination with a power density of  $100 \text{ mW cm}^{-2}$  in aqueous solutions. The measurements were performed in electrolytes: (2) – 0.1 M KOH; (3) – 0.1M KOH + 20%  $\text{CH}_3\text{OH}$ ; (4) – 0.1 M KOH + 20%  $\text{C}_2\text{H}_4(\text{OH})_2$ ; (5) – 0.1 M KOH + 20%  $\text{C}_3\text{H}_5(\text{OH})_3$ . Potential scan rate is  $10 \text{ mV s}^{-1}$ . Voltammograms in dark conditions for the alcohol-containing electrolytes solutions practically coincide with (1).

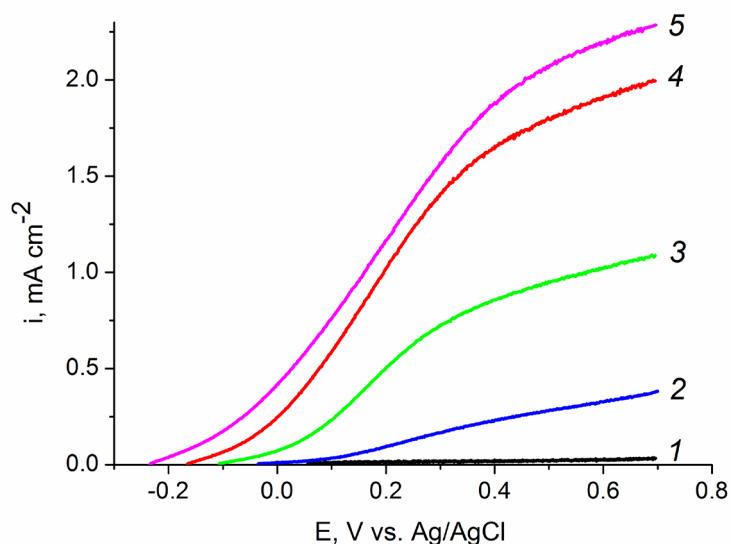

**Figure S8.** Voltammograms of the ( $\alpha$ -Fe<sub>2</sub>O<sub>3</sub>+5% Sn<sup>4+</sup>) film photoanode: (1) – dark voltammetry in 0.1 M KOH; (2 - 5) under visible light illumination with a power density of 100 mW cm<sup>-2</sup>. The measurements were performed in electrolytes: (2) – 0.1 M KOH; (3) – 0.1M KOH + 20% CH<sub>3</sub>OH; (4) – 0.1 M KOH + 20% C<sub>2</sub>H<sub>4</sub>(OH)<sub>2</sub>; (5) – 0.1 M KOH + 20% C<sub>3</sub>H<sub>5</sub>(OH)<sub>3</sub>. Potential scan rate is 10 mV s<sup>-1</sup>. Voltammograms in dark conditions for the alcohol- containing electrolytes solutions practically coincide with (1).

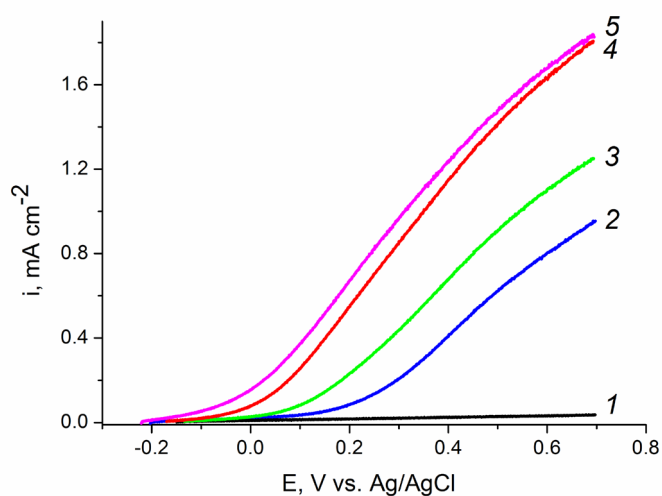

**Fig. S9.** Voltammograms of the ( $\alpha$ -Fe<sub>2</sub>O<sub>3</sub>+20% Sn<sup>4+</sup>) film photoanode: (1) dark voltammetry 0.1 M KOH; (2 - 5) – under visible light illumination with a power density of 100 mW cm<sup>-2</sup>. The measurements were performed in electrolytes: (2) – 0.1 M KOH; (3) – 0.1M KOH + 20% CH<sub>3</sub>OH; (4) – 0.1 M KOH + 20% C<sub>2</sub>H<sub>4</sub>(OH)<sub>2</sub>; (5) – 0.1 M KOH + 20% C<sub>3</sub>H<sub>5</sub>(OH)<sub>3</sub>. Potential scan rate is 10 mV s<sup>-1</sup>. Voltammograms in dark conditions for the alcohol- containing electrolytes solutions practically coincide with (1).

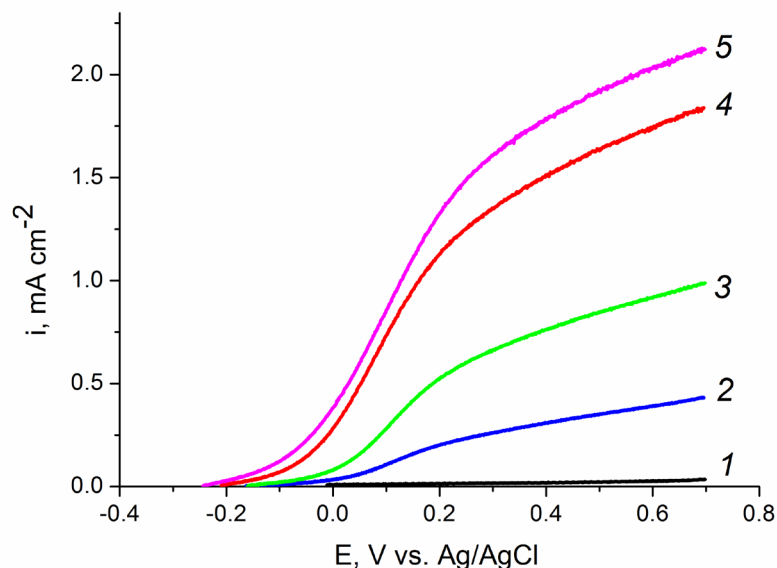

**Fig. S10.** Voltammograms of the ( $\alpha$ -Fe<sub>2</sub>O<sub>3</sub>+10% Sn<sup>4+</sup>) 75 s film photoanode: (1) dark voltammetry 0.1 M KOH; (2 - 5) – under visible light illumination with a power density of 100 mW cm<sup>-2</sup>. The measurements were performed in electrolytes: (2) – 0.1 M KOH; (3) – 0.1M KOH + 20% CH<sub>3</sub>OH; (4) – 0.1 M KOH + 20% C<sub>2</sub>H<sub>4</sub>(OH)<sub>2</sub>; (5) – 0.1 M KOH + 20% C<sub>3</sub>H<sub>5</sub>(OH)<sub>3</sub>. Potential scan rate is 10 mV s<sup>-1</sup>. Voltammograms in dark conditions for the alcohol- containing electrolytes solutions practically coincide with (1).

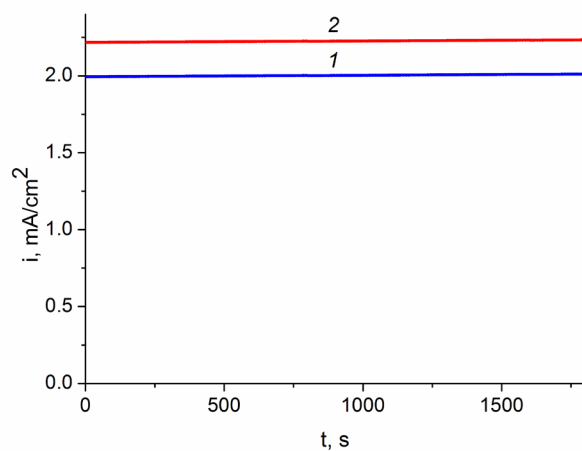

**Fig. S11.** Photocurrent variation with time measured with( $\alpha$ -Fe<sub>2</sub>O<sub>3</sub>+10% Sn<sup>4+</sup>)film photoanode at  $E=0.4$  V– (1) and at  $E=0.6$  V *vs.* Ag/AgCl – (2) under visible light illumination with a power density of 100 mW cm<sup>-2</sup> in 0.1 M KOH + 20% C<sub>3</sub>H<sub>5</sub>(OH)<sub>3</sub>.



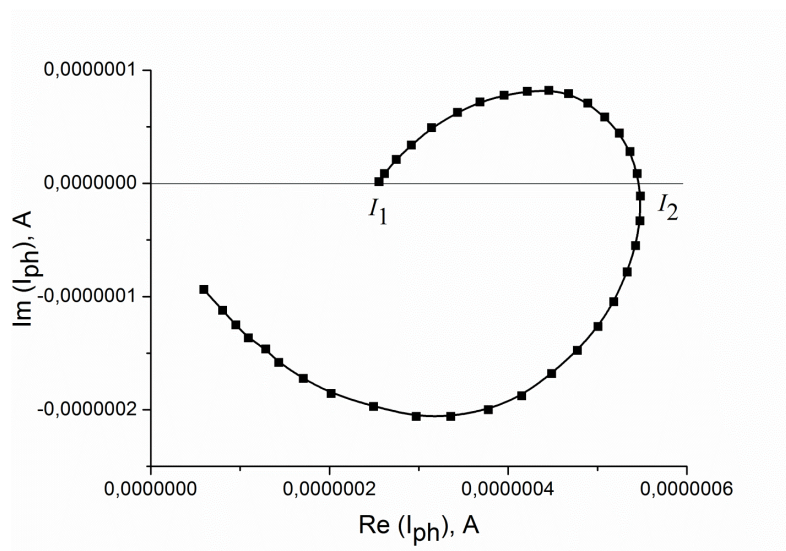

**Fig. S12.** IMPS curve measured at ( $\alpha\text{-Fe}_2\text{O}_3\text{+10\% Sn}^{4+}$ ) photoanode illuminated with monochromatic light of 453 nm at the illumination power density of 14 mW cm<sup>-2</sup> at  $E=0.5$  V *vs.* Ag/AgCl in 0.1 M KOH.
